# Supplementary material
Source: PubMed Central journal article supplement (PMC4183332)
Supplement: pnas.201409316SI.pdf [file pnas.201409316SI.pdf]

# Supporting Information

Héon et al. 10.1073/pnas.1409316111

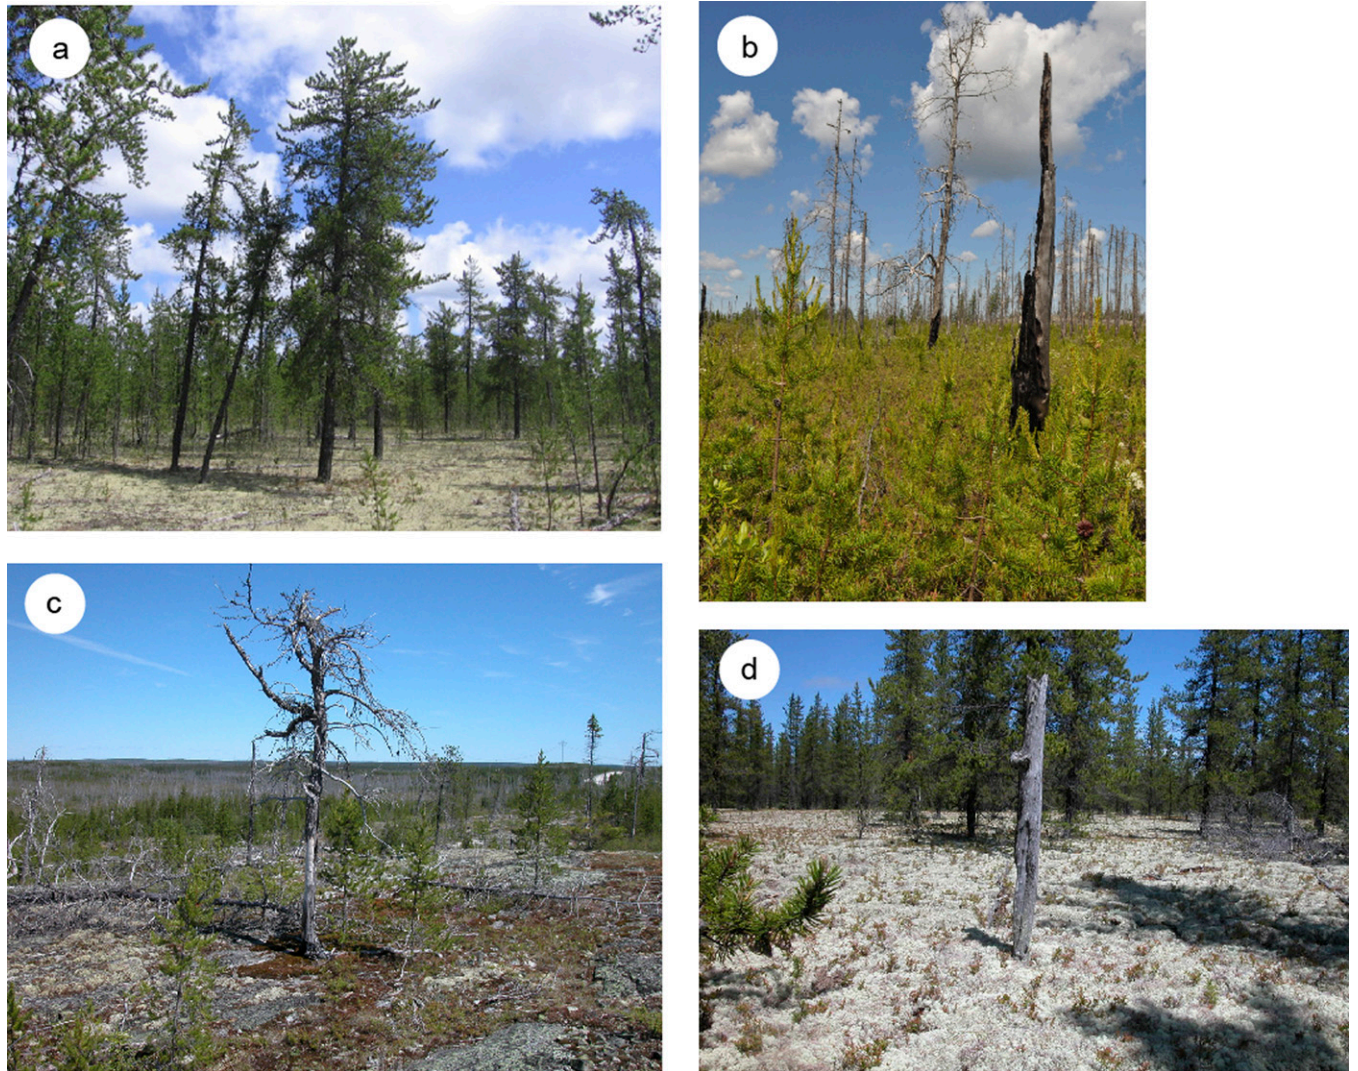

**Fig. S1.** Representative fire-scarred trees sampled in the 2 km<sup>2</sup> cells. (A) A group of fire-scarred pine trees (foreground) within a younger even-aged stand (background). (B) Two scarred pine snags (multiple scars) within a regenerating pine stand. (C) A pine snag with multiple scars (1882 and 1941) on a rocky outcrop. This specimen died during the last fire in 1989. (D) An ancient fire-scarred pine snag in cell 8. The corresponding individual established after the 1708 fire and was scarred by the 1791 fire. It was then killed by the 1872 or 1882 fires and was charred by the 1941 fire. The surrounding even-aged stand established after the last fire in 1941.





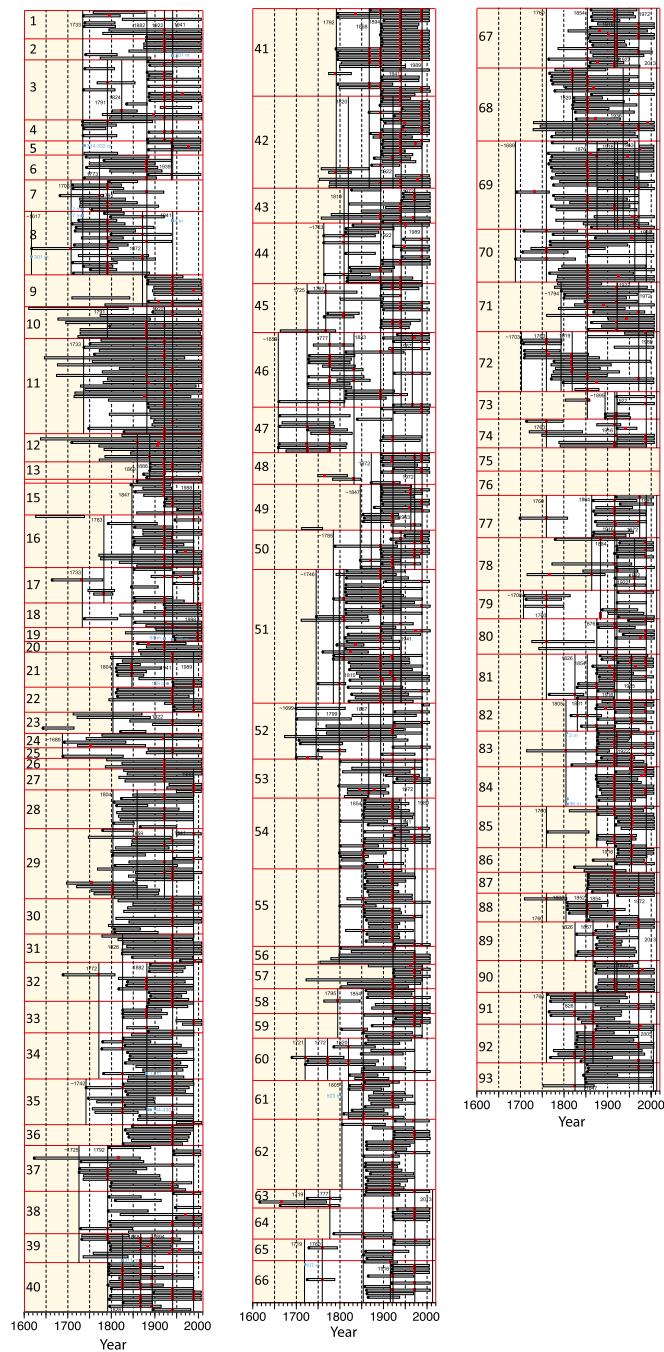

**Fig. S3.** Reconstruction of the length of overlapping fires from fire scars and first tree rings sampled in the 93 cells along the road transect. Cells are numbered to the left and are separated by horizontal red lines. Solid vertical lines represent the extent of fires across cells. Gray bars represent the periods of all cross-dated snags, woody debris, and live trees. Filled black circles refer to corrected years of first tree ring in pine trees with pith taken at less than 1 m above the root collar in individuals with an attached stump. Filled red squares indicate fire scars in pine or spruce trees. Blue circles and squares indicate first tree rings and fire scars in trees found at less than 500 m outside cells (shortest distance to the corresponding cell indicated alongside with symbols). The yellow shading indicates the period of cell inactivity before the first valid fire date in each cell. The vertical scale is arbitrary. All data displayed are included in [Dataset S1](#) except the 2013 fire (cells 63–93), which occurred after the field campaign and was mapped from LANDSAT images.
